# Supplementary material
Source: Research Square preprint supplement (doi:10.21203/rs.3.rs-9994182/v1)
Supplement: Supplementary file 1 [file fe5cf42bbc8bc716db667d8d.docx]

**Electronic supporting information**

***Dracocephalum kotschyi* Boiss.: Phytochemical profiling, green synthesis of silver nanoparticles, molecular docking, and antibacterial evaluation**

**Ali Bekhradiana, Bahador Karamia, *, Hamid Reza Rajabia, *, Valiollah Keshavarzb**

*a Chemistry Department, Yasouj University, Yasouj, 75918-74831, Iran*

*b Medical Plants Research Center, Basic Health Sciences Institute, Shahrekord University of Medical Sciences, Shahrekord, Iran*

*Corresponding authors. Tel. /Fax: +987431004126.

E-mail address: [karami@yu.ac.ir](mailto:karami@yu.ac.ir) (B. Karami), [h.rajabi@mail.yu.ac.ir](mailto:h.rajabi@mail.yu.ac.ir), [hr.rajabi@gmail.com](mailto:hr.rajabi@gmail.com) (H.R. Rajabi).

**Table S1.** Identified compounds, images, and isolated major compounds from the genus Dracocephalum.

| References | Major compounds identification and isolation in D*racocephalum*genus | Plant the picture | *Dracocephalum*genus name |
| --- | --- | --- | --- |
| [1, 2] | caffeic and ferulic acids, lutcolin-7-O-glucoside, rosmarinic acid, luteolin and apigenin | 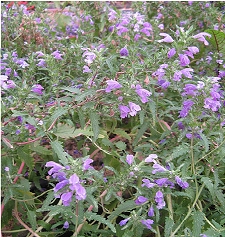 | *D. moldavica* |
| [3] | Luteolin, Caffeic acid, Apigenin, Caftaric acid, Luteolin 3′-*O*-glucoside | 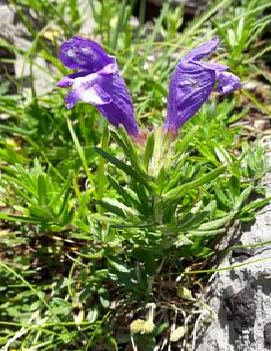 | *D. austriacum* |
| [4] | Luteolin, Apigenin, apigenin 7-O-glucoside, Caftaric acid, Caffeic acid, Luteolin 3′-*O*-glucoside | 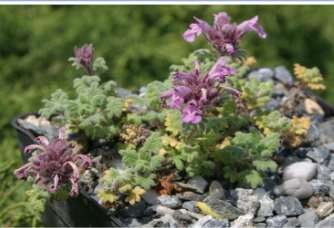 | *D. botryoides* |
| [5] | calycopterin, xanthomicrol, isokaempferide, luteolin and apigenin | 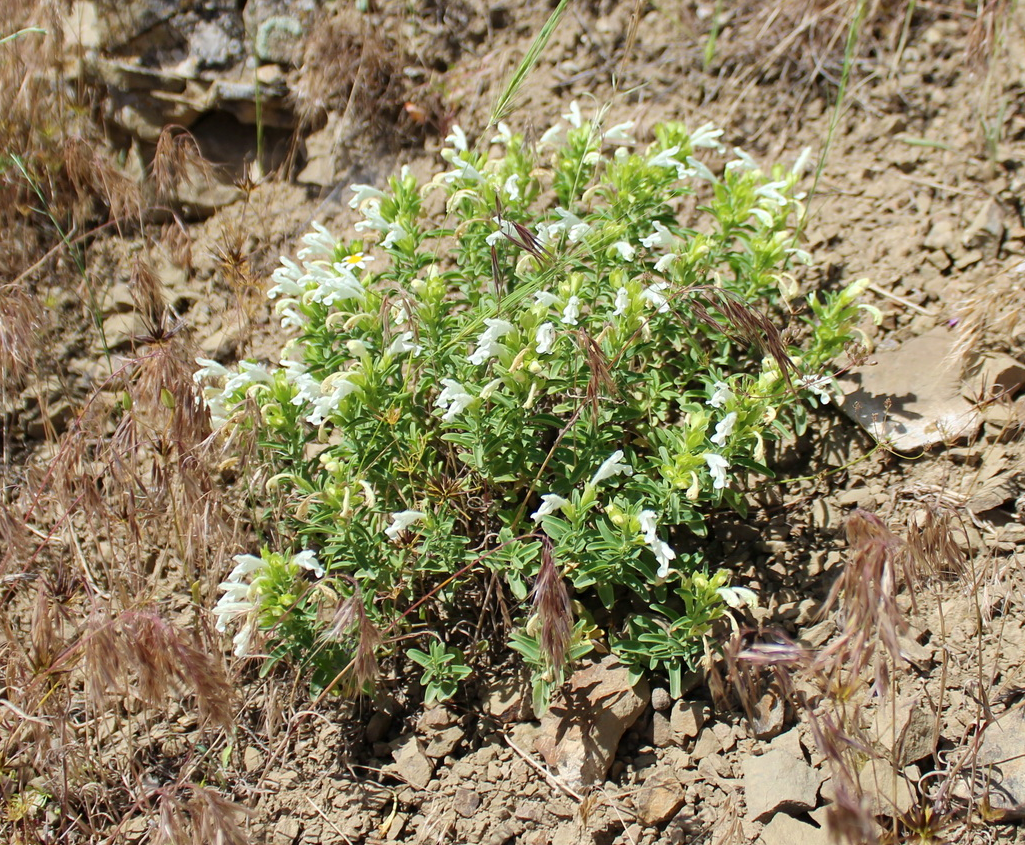 | *D. subcapitatum* |
| [6] | cinnamic acid, ferulic acid , caffeic acid, diosmetin, luteolin (7), 5,3',4'-trihydroxy-3,7-dimethoxyflavone, eriodictyol, kaempferol, quercetin, acacetin-7-O-glcopyranoside glucopyranoside, luteolin-7-O-glucopyranoside, kaempferide-3-O-rhamnopyranoside, quercitrin, kaempferol-3-O-glucopyranoside, prunasin, quercetin-7-O-glucopyranoside, quercetin-3-O-glucopyranoside, plantaginin, linarin, luteolin-7-O-rutinoside, and chlorogenic acid | 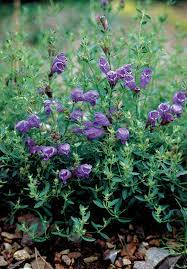 | *D. peregrinum* |
| [7, 8] | Luteolin -7-O-β-D-glucopyranoside and Luteolin 7-O-β-D-glucosiduronate, luteolin 7-O-rutinoside, Luteolin 7-O-glucoside, acylated luteolin, Apigenin 7-O-glucoside | 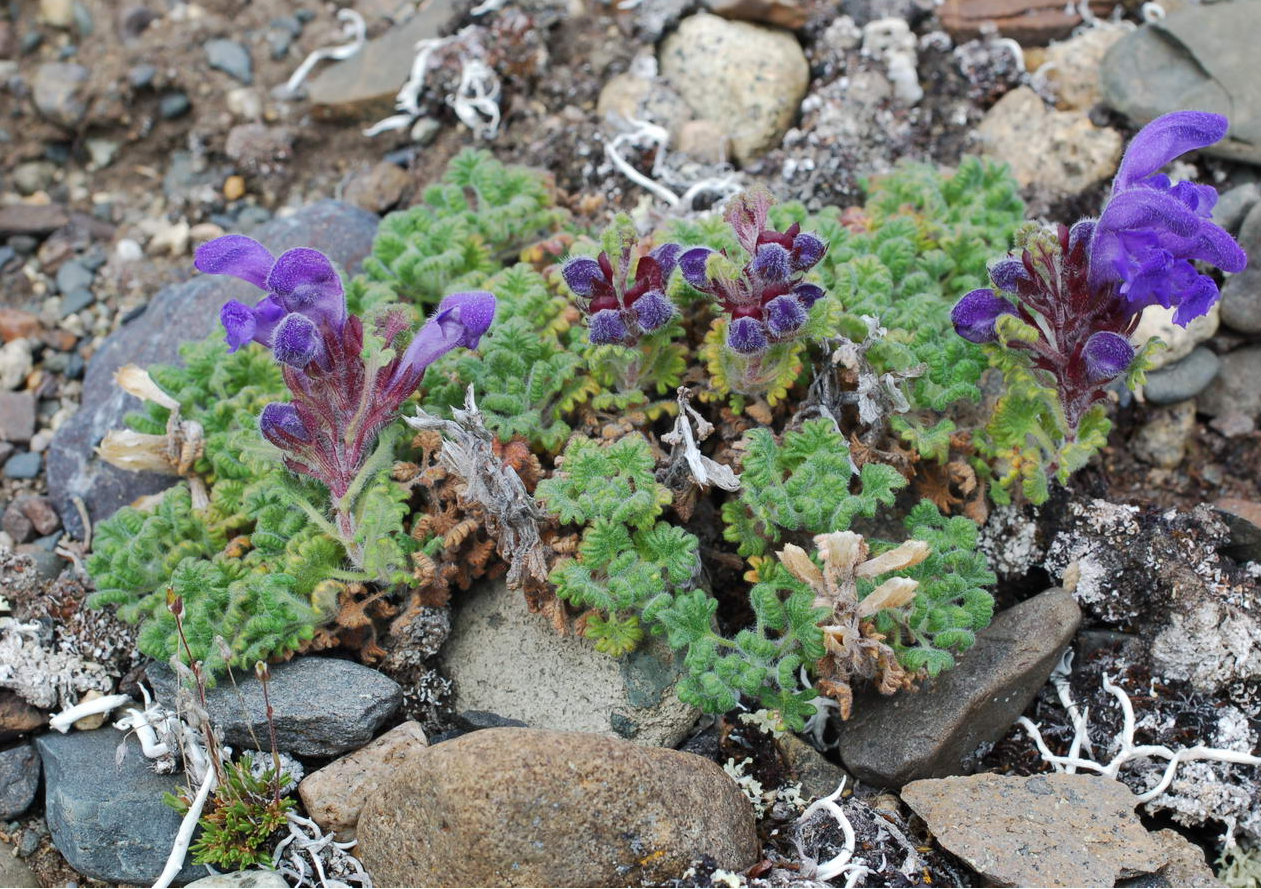 | *D. palmatum* |
| [9, 10] | 5,7-dihydroxychromone, eriodictyol-7-O-beta-d-glucoside, luteolin-7-O-beta-d-glucoside, naringenin-7-O-beta-d-glucoside, apigenin-7-O-beta-d-glucoside, eriodictyol, luteolin, naringenin and apigenin. | 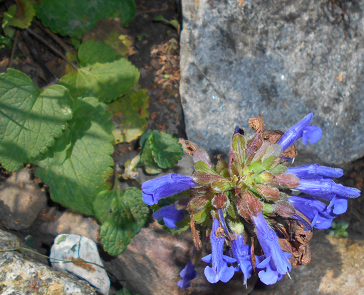 | *D. rupestre* |
| [11] | Luteolin 7-O-glucoside, Apigenin 7-O-glucoside,  ladanetin-6-O-β-(6″-O-acetyl)glucoside, and pedalitin-3'-O-β-glucoside | 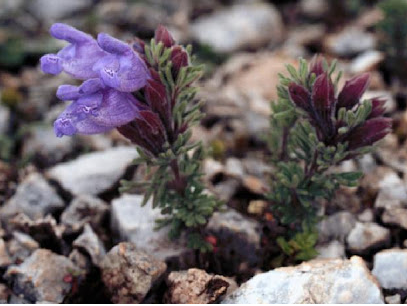 | *D. tanguticum* |
| [13] | Luteolin 30 -O-glucoside, | 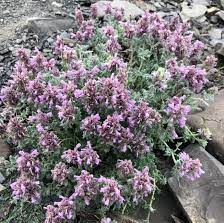 | *D. thumiﬂorum* |
| [14] | Luteolin, apigenin, xanthomicrol, calycopterin, ermanin, circilineol, 5-demethylsinenstin, cirsimaritin and 5,7,4´-trihydroxy 3,3´-dimethoxyflavone | 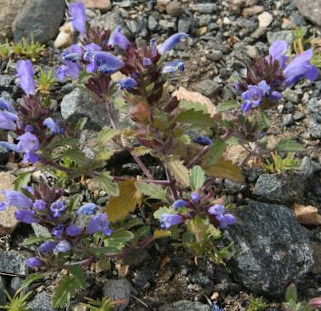 | *D. oligadenium* |
| [15] | Apigenin | 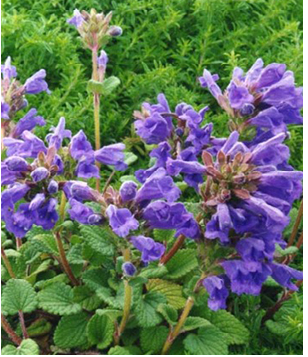 | *D. polychaetum* |

**Refrences**

1. Dastmalchi K, Dorman D, Kosar M, Hiltunen R,(2007). Chemical composition and in vitro antioxidant evaluation of a water-soluble *Moldavian balm* (*Dracocephalum moldavica* L.) extract. LWT-Food Science and Technology, 40(2), 239-28.

2. Yang LN, [Xing](https://www.researchgate.net/scientific-contributions/Jian-Guo-Xing-2123244358?_tp=eyJjb250ZXh0Ijp7ImZpcnN0UGFnZSI6InB1YmxpY2F0aW9uIiwicGFnZSI6InB1YmxpY2F0aW9uIn19) JG, [He](https://www.researchgate.net/scientific-contributions/Cheng-Hui-He-2043339227?_tp=eyJjb250ZXh0Ijp7ImZpcnN0UGFnZSI6InB1YmxpY2F0aW9uIiwicGFnZSI6InB1YmxpY2F0aW9uIn19) CH, [Wu](https://www.researchgate.net/profile/Tong-Wu-105?_tp=eyJjb250ZXh0Ijp7ImZpcnN0UGFnZSI6InB1YmxpY2F0aW9uIiwicGFnZSI6InB1YmxpY2F0aW9uIn19) T (2014). The phenolic compounds from *Dracocephalum moldavica* L. *Biochemical Systematics and Ecology , 54*, 19-22.

3. Kashchenko NI, [Jafarova](https://pubmed.ncbi.nlm.nih.gov/?term=Jafarova+GS&cauthor_id=36015428) GS, [Isaev](https://pubmed.ncbi.nlm.nih.gov/?term=Isaev+JI&cauthor_id=36015428) JI, [Olennikov](https://pubmed.ncbi.nlm.nih.gov/?term=Olennikov+DN&cauthor_id=36015428) DN, [Chirikova](https://pubmed.ncbi.nlm.nih.gov/?term=Chirikova+NK&cauthor_id=36015428) NK(2022). Caucasian Dragonheads: Phenolic Compounds,Polysaccharides, and Bioactivity of *Dracocephalum austriacum* and *Dracocephalum botryoides*. *plants, 11*, 1-23.

4. Saeidnia S, Gohari AR, Hadjiakhoondi A, Shafiee A (2007). Bioactive compounds of the volatile oil of *Dracocephalum kotschyi*. *Zeitschrift für Naturforschung C, 62*, 793-796. doi:https://doi.org/10.1515/znc-2007-11-1203

5. Dai LM, [Zhao](https://pubmed.ncbi.nlm.nih.gov/?term=Zhao+CC&cauthor_id=18958424) CC, [Jin](https://pubmed.ncbi.nlm.nih.gov/?term=Jin+HZ&cauthor_id=18958424) HZ, [Tang](https://pubmed.ncbi.nlm.nih.gov/?term=Tang+J&cauthor_id=18958424) J, [Shen](https://pubmed.ncbi.nlm.nih.gov/?term=Shen+YH&cauthor_id=18958424) YH, [Li](https://pubmed.ncbi.nlm.nih.gov/?term=Li+HL&cauthor_id=18958424) HL, [Peng](https://pubmed.ncbi.nlm.nih.gov/?term=Peng+CY&cauthor_id=18958424) CY, [Zhang](https://pubmed.ncbi.nlm.nih.gov/?term=Zhang+WD&cauthor_id=18958424) WD (2008). A new ferulic acid ester and other constituents from *Dracocephalum* *peregrinum*. Archives of Pharmacal Research, 31, 1325-1329.

6. Olennikov DN, Chirikova NK, Kashchenko NI, Gornostai TG, Selyutina IY, Zilfikarov IN (2017). Effect of Low Temperature Cultivation on the Phytochemical Profile and Bioactivity of Arctic Plants: A Case of *Dracocephalum palmatum*. International Journal of Molecular Sciences , 18(12), 2579.

7. Olennikov DN, Chirikova K, Kim E, Kim SW, Zul′fugarov IS (2018). New Glycosides of Eriodictyol from *Dracocephalum palmatum*. Chemistry of Natural Compounds, 54(5), 860-863.

8. Ren DM,[Lou](https://pubmed.ncbi.nlm.nih.gov/?term=Lou+HX&cauthor_id=15575203) HX, [Ma](https://pubmed.ncbi.nlm.nih.gov/?term=Ma+B&cauthor_id=15575203) B, [Ji](https://pubmed.ncbi.nlm.nih.gov/?term=Ji+M&cauthor_id=15575203) M (2004). Determination of luteolin-7-O-glycoside in the herb of *Dracocephalum rupestra* by HPLC. zhongguo zhong yao za zhi, 29(9), 860-862.

9. Ren DM, [Qu](https://pubmed.ncbi.nlm.nih.gov/?term=Qu+Z&cauthor_id=18930620) Z, [Wang](https://pubmed.ncbi.nlm.nih.gov/?term=Wang+XN&cauthor_id=18930620) XN, [Shi](https://pubmed.ncbi.nlm.nih.gov/?term=Shi+J&cauthor_id=18930620) J, [Lou](https://pubmed.ncbi.nlm.nih.gov/?term=Lou+HX&cauthor_id=18930620) HX (2008). Simultaneous determination of nine major active compounds in *Dracocephalum rupestre* by HPLC. Journal of Pharmaceutical and Biomedical Analysis, 48(5), 141-1445.

10. Wang ShQ, [Han](https://pubmed.ncbi.nlm.nih.gov/?term=Han+XZ&cauthor_id=20932762) XZ, [Li](https://pubmed.ncbi.nlm.nih.gov/?term=Li+X&cauthor_id=20932762) X, [Ren](https://pubmed.ncbi.nlm.nih.gov/?term=Ren+DM&cauthor_id=20932762) DM, [Wang](https://pubmed.ncbi.nlm.nih.gov/?term=Wang+XN&cauthor_id=20932762) XN, [Lou](https://pubmed.ncbi.nlm.nih.gov/?term=Lou+HX&cauthor_id=20932762) HX (2010). Flavonoids from *Dracocephalum tanguticum* and their cardioprotective effects against doxorubicin-induced

11. Litvinenko V (1965). A new flavonoid glycoside from *Dracocephalum thumiflorum* L. Chemistry of Natural Compounds, 1, 108-109.

12. Ashrafian Sh, [Farimani](https://www.researchgate.net/profile/Mahdi-Farimani?_tp=eyJjb250ZXh0Ijp7ImZpcnN0UGFnZSI6InB1YmxpY2F0aW9uIiwicGFnZSI6InB1YmxpY2F0aW9uIn19) MM, [Sonboli](https://www.researchgate.net/profile/Ali-Sonboli?_tp=eyJjb250ZXh0Ijp7ImZpcnN0UGFnZSI6InB1YmxpY2F0aW9uIiwicGFnZSI6InB1YmxpY2F0aW9uIn19) A, [Ashrafian](https://www.researchgate.net/profile/Hossein-Ashrafian-2?_tp=eyJjb250ZXh0Ijp7ImZpcnN0UGFnZSI6InB1YmxpY2F0aW9uIiwicGFnZSI6InB1YmxpY2F0aW9uIn19) H (2022). Simultaneous characterization of nine isolated flavonoids in Iranian *Dracocephalum* species and in silico study of their inhibitory properties against MTH1 enzyme. South African Journal of Botany, 146(1), 254-261.

13. Pouraboli I, [Nazari](https://pubmed.ncbi.nlm.nih.gov/?term=Nazari+S&cauthor_id=25901731) S, [Sabet](https://pubmed.ncbi.nlm.nih.gov/?term=Sabet+N&cauthor_id=25901731) N, [Sharififar](https://pubmed.ncbi.nlm.nih.gov/?term=Sharififar+F&cauthor_id=25901731) F, [Jafari](https://pubmed.ncbi.nlm.nih.gov/?term=Jafari+M&cauthor_id=25901731) M(2016). Antidiabetic, antioxidant, and antilipid peroxidative activities of *Dracocephalum* *polychaetum* shoot extract in streptozotocin-induced diabetic rats: In vivo and in vitro studies. Pharmaceutical Biology, 54(2), 272-278.

**Table S2.** Antibacterial activity of standard antibiotics (gentamicin and rifampin) used as positive controls.

| **Gentamicin** | | **Rifampin** | | **Antibiotics** |
| --- | --- | --- | --- | --- |
| **MIC** | **DD** | **MIC** | **DZ** |
| 7.8 | 20 | 7.8 | 11 | *Escherichia coli*  (ATCC 25922) |
| 500 | 21 | 250 | 10 | Staphylococcus aureus (ATCC 29737) |
| 3.90 | 30 | 31.25 | 19 | Bacillus subtilis  (ATCC 6633) |
| 7.81 | 20 | 31.25 | NA | pseudomonas aeruginosa  (ATCC 27853) |


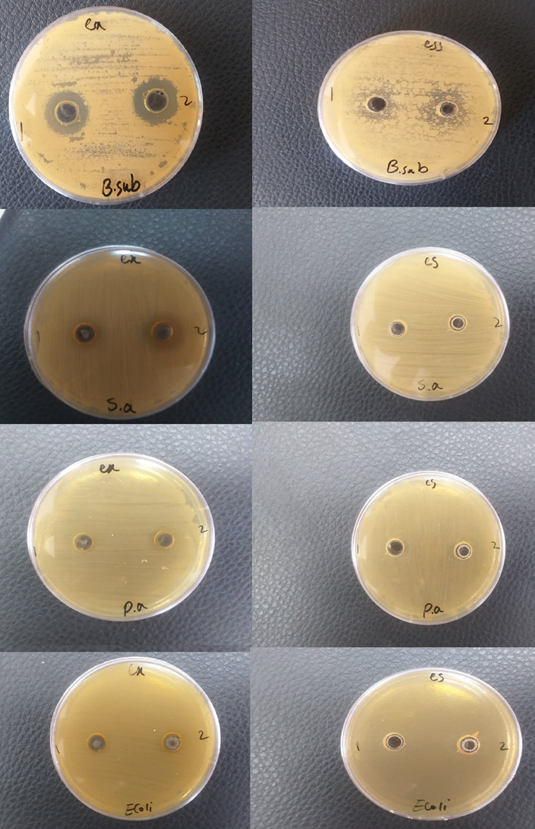


**Fig. S1.** Agar plate diffusion assay for antibacterial activity of D. kotschyi extract and essential oil against Bacillus subtilis, Staphylococcus aureus, Escherichia coli, and Pseudomonas aeruginosa.


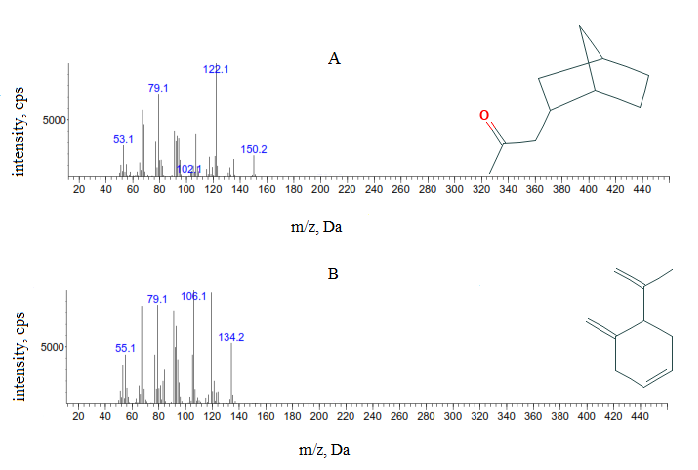


**Fig. S2.** Mass spectra and proposed structures of compounds identified in the essential oil of the genus Dracocephalum: (A) 2-propanone,1-bicyclo[2.2.1]hept-2-yl; (B) 1(7),4,8-O-menthatriene.


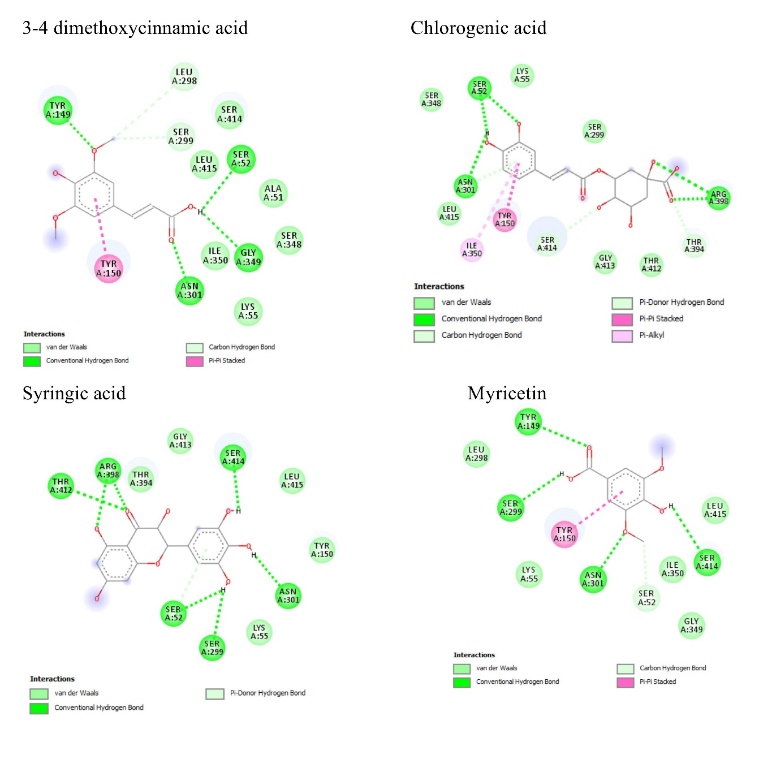


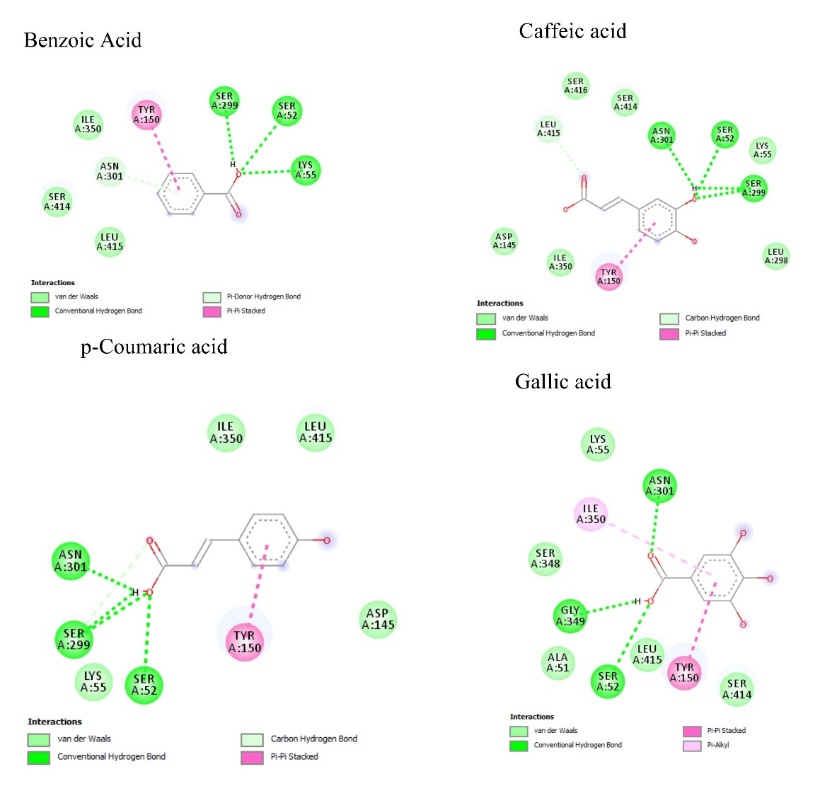

**Fig. S3.** Two-dimensional structures and involved residues in the active site of 2J9P for compounds extracted from *D. kotschyi*.


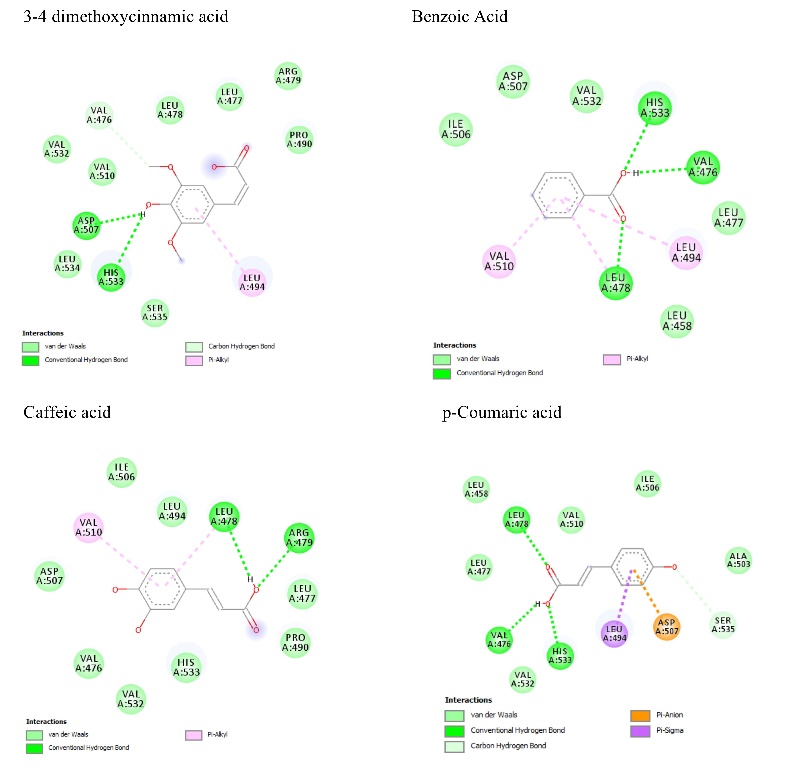


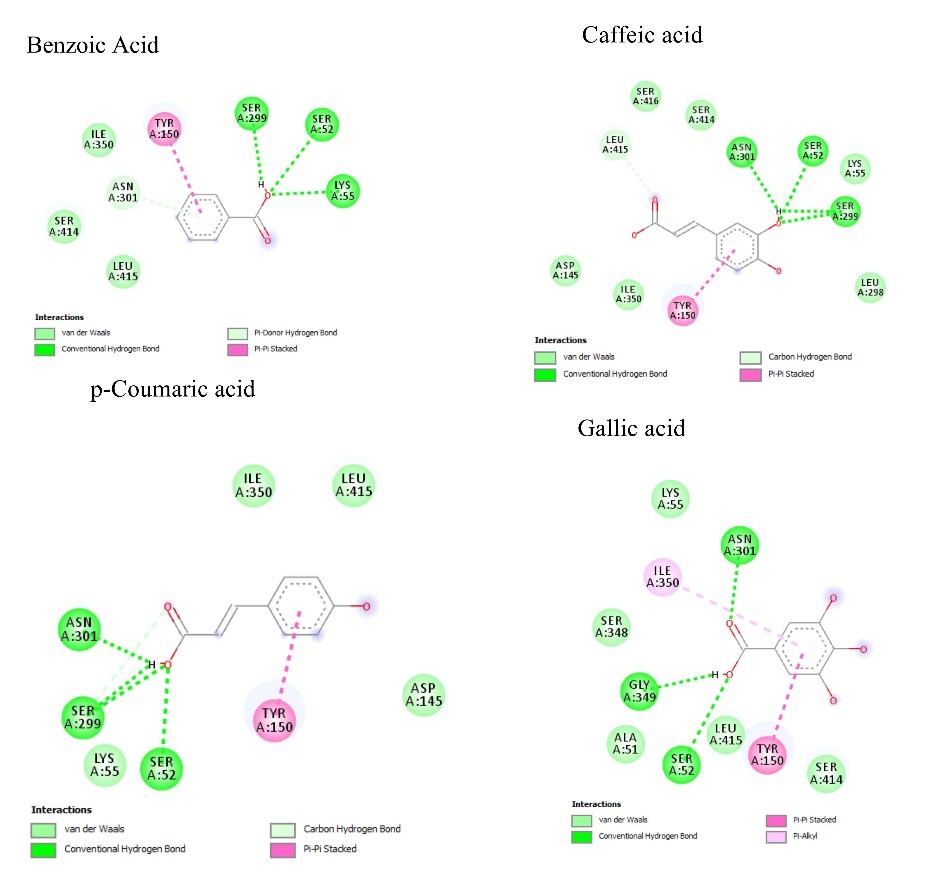


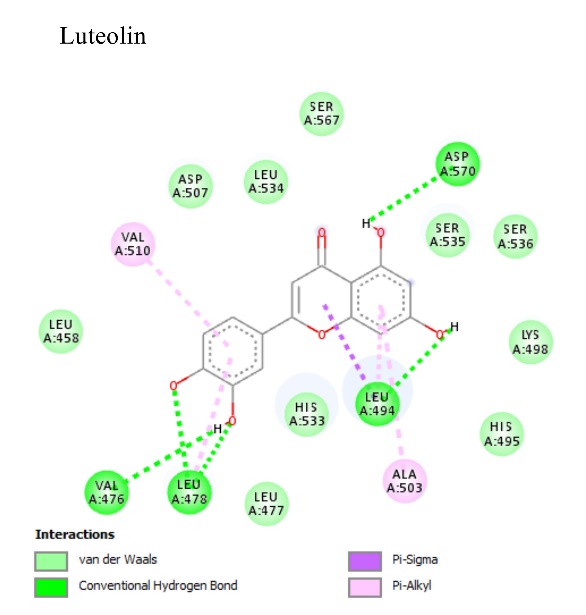


**Fig. S4.** Two-dimensional structures and involved residues in the active site of 3HV8 for compounds extracted from D. kotschyi.
